# Supplementary material for: Gender Differences in the Indirect Effect of Psychosocial Work Environment in the Association of Precarious Employment and Chronic Stress: A Cross-Sectional Mediation Analysis
Source: MDPI journal article supplement (doi:10.3390/ijerph192316073), 2022-12-01
Supplement: s1 [file s1]

Supplementary Table S1. Goodness-of-fit PRF's and WLC scales from exploratory factor analysis. Precarious Employment and Stress Study sample, 2020. N men=125, N women= 130.

| Variable                                                                                                     | Factor 1 | Factor 2 | Factor 3 | Factor 4 | Uniqueness |
|--------------------------------------------------------------------------------------------------------------|----------|----------|----------|----------|------------|
| How often do you not have time to complete all your work tasks?                                              | 0.28     | -0.17    | 0.55     |          | 0.59       |
| Do you have enough time for your work tasks?                                                                 | 0.37     |          | 0.53     |          | 0.56       |
| Do you have to work very fast?                                                                               | 0.40     | 0.12     | 0.43     | 0.12     | 0.63       |
| Do you have to deal with other people's personal problems as part of your work?                              |          |          | 0.49     | -0.12    | 0.74       |
| Do you work at a high pace throughout the day?                                                               | 0.35     |          | 0.54     |          | 0.58       |
| Is your work emotionally demanding?                                                                          | 0.31     | 0.14     | 0.65     |          | 0.46       |
| Does your work require that you hide your feelings?                                                          | 0.20     | 0.26     | 0.47     |          | 0.66       |
| Do you have a large degree of influence on the decisions concerning your work?                               |          | 0.20     | -0.13    | 0.65     | 0.52       |
| Do you have any influence on HOW you do your work?                                                           |          | 0.17     |          | 0.67     | 0.50       |
| Do you have the possibility of learning new things through your work?                                        | 0.12     | 0.51     | -0.32    | 0.32     | 0.52       |
| Can you use your skills or expertise in your work?                                                           |          | 0.45     | -0.30    | 0.32     | 0.60       |
| Do you feel that the work you do is important?                                                               |          | 0.42     |          | 0.13     | 0.80       |
| How often do you get help and support from your immediate superior, if needed?                               | 0.19     | 0.65     | 0.18     | 0.17     | 0.48       |
| How often does your immediate superior talk with you about how well you carry out your work?                 |          | 0.63     |          | 0.23     | 0.55       |
| How often do you get help and support from your colleagues, if needed?                                       |          | 0.64     |          |          | 0.58       |
| Do you feel part of a community at your place of work?                                                       |          | 0.63     |          |          | 0.59       |
| Do you feel that your work drains so much of your energy that it has a negative effect on your private life? | 0.76     | 0.12     | 0.21     |          | 0.35       |
| Do you feel that your work takes so much of your time that it has a negative effect on your private life?    | 0.85     |          | 0.10     |          | 0.26       |
| Are there times when you need to be at work and at home at the same time?                                    | 0.42     |          | 0.15     | -0.18    | 0.77       |
| The demands of my work interfere with my private and family life?                                            | 0.68     |          | 0.16     |          | 0.50       |

Supplementary Table S2. Goodness-of-fit PRF's and WLC scales from confirmatory factor analysis. Precarious Employment and Stress Study sample, 2020, N men=125, N women= 130.

|                                  | $\chi^2$ [df], p-value       | CFI   | $\Delta$ CFI | TLI   | $\Delta$ TLI | RMSEA (90% CI)          | $\Delta$ RMSEA |
|----------------------------------|------------------------------|-------|--------------|-------|--------------|-------------------------|----------------|
| Regular CFA                      |                              |       |              |       |              |                         |                |
|                                  | 732.672 [203];<br>p<0.001    | 0.939 | -            | 0.930 | -            | 0.104 (0.096-<br>0.112) | -              |
| Multi-group CFA by women and men |                              |       |              |       |              |                         |                |
| Configural invariance            | 1044.355 [406];<br>p<0.001   | 0.935 | 0            | 0.926 | 0            | 0.114 (0.106-<br>0.123) | 0.010          |
| Metric invariance                | 10344.527 [462];<br>p<0.001  | 0.930 | -0.005       | 0.924 | -0.002       | 0.116 (0.108-<br>0.124) | 0.002          |
| Thresholds invariance            | 31.217.153 [368];<br>p<0.001 | 0.935 | 0.005        | 0.938 | -0.014       | 0.105 (0.097-<br>0.113) | -0.011         |

Supplementary Table S3. Reliability of PRF's and WLC scales from Cronbach's alpha.  
Precarious Employment and Stress Study sample. 2020. N men=125. N women= 130.

| Item                                                                                                         | Obs | Sign | Item-test correlation | Item-rest correlation | Average interitem covariance | Alpha |
|--------------------------------------------------------------------------------------------------------------|-----|------|-----------------------|-----------------------|------------------------------|-------|
| <b>Demands</b>                                                                                               |     |      |                       |                       |                              |       |
| How often do you not have time to complete all your work tasks?                                              | 254 | +    | 0.64                  | 0.48                  | 0.03                         | 0.76  |
| Do you have enough time for your work tasks?                                                                 | 254 | +    | 0.65                  | 0.51                  | 0.03                         | 0.75  |
| Do you have to work very fast?                                                                               | 254 | +    | 0.61                  | 0.48                  | 0.04                         | 0.76  |
| Do you have to deal with other people's personal problems as part of your work?                              | 254 | +    | 0.60                  | 0.41                  | 0.04                         | 0.77  |
| Do you work at a high pace throughout the day?                                                               | 254 | +    | 0.69                  | 0.57                  | 0.03                         | 0.74  |
| Is your work emotionally demanding?                                                                          | 254 | +    | 0.77                  | 0.64                  | 0.03                         | 0.72  |
| Does your work require that you hide your feelings?                                                          | 254 | +    | 0.64                  | 0.46                  | 0.03                         | 0.76  |
| Test scale                                                                                                   |     |      |                       |                       | 0.03                         | 0.78  |
| <b>Control</b>                                                                                               |     |      |                       |                       |                              |       |
| Do you have a large degree of influence on the decisions concerning your work?                               | 255 | +    | 0.70                  | 0.48                  | 0.03                         | 0.66  |
| Do you have any influence on HOW you do your work?                                                           | 255 | +    | 0.64                  | 0.43                  | 0.03                         | 0.68  |
| Do you have the possibility of learning new things through your work?                                        | 255 | +    | 0.77                  | 0.56                  | 0.02                         | 0.62  |
| Can you use your skills or expertise in your work?                                                           | 255 | +    | 0.73                  | 0.53                  | 0.02                         | 0.64  |
| Do you feel that the work you do is important?                                                               | 255 | +    | 0.55                  | 0.36                  | 0.03                         | 0.70  |
| Test scale                                                                                                   |     |      |                       |                       | 0.03                         | 0.71  |
| <b>Support</b>                                                                                               |     |      |                       |                       |                              |       |
| How often do you get help and support from your immediate superior. if needed?                               | 246 | +    | 0.81                  | 0.63                  | 0.03                         | 0.66  |
| How often does your immediate superior talk with you about how well you carry out your work?                 | 246 | +    | 0.78                  | 0.56                  | 0.03                         | 0.71  |
| How often do you get help and support from your colleagues. if needed?                                       | 246 | +    | 0.73                  | 0.54                  | 0.04                         | 0.72  |
| Do you feel part of a community at your place of work?                                                       | 246 | +    | 0.72                  | 0.52                  | 0.04                         | 0.72  |
| Test scale                                                                                                   |     |      |                       |                       | 0.03                         | 0.76  |
| <b>Work-life conflict</b>                                                                                    |     |      |                       |                       |                              |       |
| Do you feel that your work drains so much of your energy that it has a negative effect on your private life? | 253 | +    | 0.85                  | 0.70                  | 0.04                         | 0.72  |
| Do you feel that your work takes so much of your time that it has a negative effect on your private life?    | 253 | +    | 0.89                  | 0.76                  | 0.04                         | 0.68  |
| Are there times when you need to be at work and at home at the same time?                                    | 253 | +    | 0.61                  | 0.40                  | 0.07                         | 0.85  |
| The demands of my work interfere with my private and family life?                                            | 253 | +    | 0.81                  | 0.65                  | 0.05                         | 0.74  |
| Test scale                                                                                                   |     |      |                       |                       | 0.05                         | 0.81  |
